# Supplementary material for: Dapagliflozin Plus Saxagliptin Add-on Therapy Compared With Insulin in Patients With Type 2 Diabetes Poorly Controlled by Metformin With or Without Sulfonylurea Therapy: A Randomized Clinical Trial
Source: Oxford University Press journal article supplement (doi:10.2337/dc18-1988), 2019-06-04
Supplement: dc181988supplementarydata.pdf [file dc181988supplementarydata.pdf]

SUPPLEMENTARY DATA

**Supplementary Table S1.** Fasting plasma glucose

|                                | <b>DAPA +<br/>SAXA + MET<br/>(n = 324)</b> | <b>INS + MET<br/>(n = 319)</b> |
|--------------------------------|--------------------------------------------|--------------------------------|
| FPG, mg/dL                     |                                            |                                |
| Baseline mean ± SD             | n = 324<br>189.5 ± 55.5                    | n = 319<br>188.6 ± 53.8        |
| Week 24 mean ± SD              | n = 287<br>144.0 ± 37.4                    | n = 281<br>137.2 ± 43.2        |
| Mean change from baseline ± SE | -45.8 ± 3.0                                | -52.7 ± 3.6                    |
| FPG, mmol/L                    |                                            |                                |
| Baseline mean ± SD             | n = 324<br>10.5 ± 3.1                      | n = 319<br>10.5 ± 3.0          |
| Week 24 mean ± SD              | n = 298<br>8.0 ± 2.1                       | n = 289<br>7.6 ± 2.4           |
| Mean change from baseline ± SE | -2.5 ± 0.2                                 | -2.9 ± 0.2                     |

DAPA, dapagliflozin; FPG, fasting plasma glucose; INS, insulin; MET, metformin; SAXA, saxagliptin; SD, standard deviation; SE, standard error.

SUPPLEMENTARY DATA

**Supplementary Table S2.** Vital signs variables

| <b>Vital signs variable</b>           | <b>DAPA +<br/>SAXA + MET<br/>(n = 324)</b> | <b>INS + MET<br/>(n = 319)</b> |
|---------------------------------------|--------------------------------------------|--------------------------------|
| <b>Systolic blood pressure, mmHg</b>  |                                            |                                |
| Baseline mean ± SD                    | n = 324<br>129.1 ± 14.6                    | n = 319<br>129.4 ± 14.3        |
| Week 24 mean ± SD                     | n = 298<br>127.5 ± 14.9                    | n = 289<br>129.2 ± 14.3        |
| Mean change from baseline ± SD        | -1.6 ± 13.2                                | -0.6 ± 13.3                    |
| <b>Diastolic blood pressure, mmHg</b> |                                            |                                |
| Baseline mean ± SD                    | n = 324<br>78.1 ± 9.0                      | n = 319<br>78.0 ± 8.6          |
| Week 24 mean ± SD                     | n = 298<br>77.2 ± 8.7                      | n = 289<br>77.6 ± 8.6          |
| Mean change from baseline ± SD        | -0.8 ± 7.6                                 | -0.5 ± 7.1                     |
| <b>Heart rate, beats/min</b>          |                                            |                                |
| Baseline mean ± SD                    | n = 324<br>76.1 ± 9.9                      | n = 319<br>74.6 ± 9.9          |
| Week 24 mean ± SD                     | n = 298<br>75.1 ± 9.6                      | n = 289<br>75.0 ± 10.2         |
| Mean change from baseline ± SD        | -0.8 ± 7.6                                 | 0.5 ± 8.5                      |

Patients were sitting for all measures.

DAPA, dapagliflozin; INS, insulin; MET, metformin; SAXA, saxagliptin; SD, standard deviation.

SUPPLEMENTARY DATA

**Supplementary Table S3. Lipids**

| <b>Parameter</b>                        | <b>DAPA + SAXA +<br/>MET<br/>(n = 324)</b> | <b>INS + ME<br/>(n = 319)</b> |
|-----------------------------------------|--------------------------------------------|-------------------------------|
| <b>Cholesterol (mmol/L)</b>             |                                            |                               |
| Baseline mean ± SD                      | n = 324<br>4.65 ± 1.20                     | n = 319<br>4.66 ± 1.09        |
| Week 24 mean ± SD                       | n = 318<br>4.73 ± 1.18                     | n = 301<br>4.60 ± 1.05        |
| Mean change from baseline ± SE (95% CI) | 0.09 ± 0.06 (–0.02, 0.19)                  | –0.07 ± 0.05 (–0.17, 0.03)    |
| <b>HDL cholesterol (mmol/L)</b>         |                                            |                               |
| Baseline mean ± SD                      | n = 324<br>1.15 ± 0.34                     | n = 319<br>1.56 ± 0.32        |
| Week 24 mean ± SD                       | n = 318<br>1.19 ± 0.35                     | n = 301<br>1.17 ± 0.29        |
| Mean change from baseline ± SE (95% CI) | 0.03 ± 0.01 (0.01, 0.10)                   | 0.02 ± 0.01 (0.0, 0.04)       |
| <b>LDL cholesterol (mmol/L)</b>         |                                            |                               |
| Baseline mean ± SD                      | n = 309<br>2.53 ± 0.88                     | n = 308<br>2.54 ± 0.86        |
| Week 24 mean ± SD                       | n = 309<br>2.59 ± 0.95                     | n = 298<br>2.59 ± 0.88        |
| Mean change from baseline ± SE (95% CI) | 0.10 ± 0.05 (0.01, 0.19)                   | 0.05 ± 0.04 (–0.03, 0.13)     |
| <b>Triglycerides (mmol/L)</b>           |                                            |                               |
| Baseline mean ± SD                      | n = 324<br>2.39 ± 3.02                     | n = 319<br>2.22 ± 1.77        |
| Week 24 mean ± SD                       | n = 318<br>2.23 ± 2.43                     | n = 301<br>1.89 ± 1.32        |
| Mean change from baseline ± SE (95% CI) | –0.17 ± 0.09 (–0.34, 0.01)                 | –0.34 ± 0.09 (–0.52, –0.15)   |

CI, confidence interval; DAPA, dapagliflozin; INS, insulin; MET, metformin; SAXA, saxagliptin; SD, standard deviation; SE, standard error.

SUPPLEMENTARY DATA

**Supplementary Figure S1.** Patient flow diagram.

\*Additional visits only for patients participating in CGM sub-study.

BMI, body mass index; CGM, continuous glucose monitoring; CrCl, creatinine clearance; DAPA, dapagliflozin; INS, insulin; IR, immediate release; MET, metformin; SAXA, saxagliptin; SU, sulfonylurea; XR, extended release.

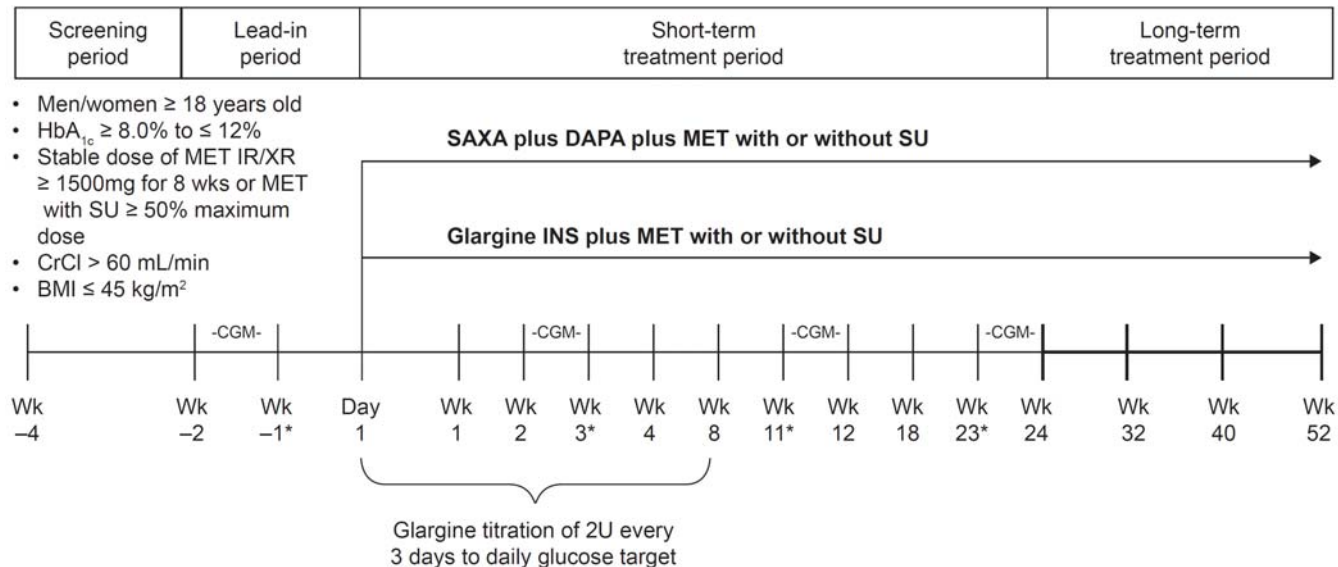

SUPPLEMENTARY DATA

**Supplementary Figure S2**—Patient flow diagram.

DAPA, dapagliflozin; INS, insulin; MET, metformin; SAXA, saxagliptin.

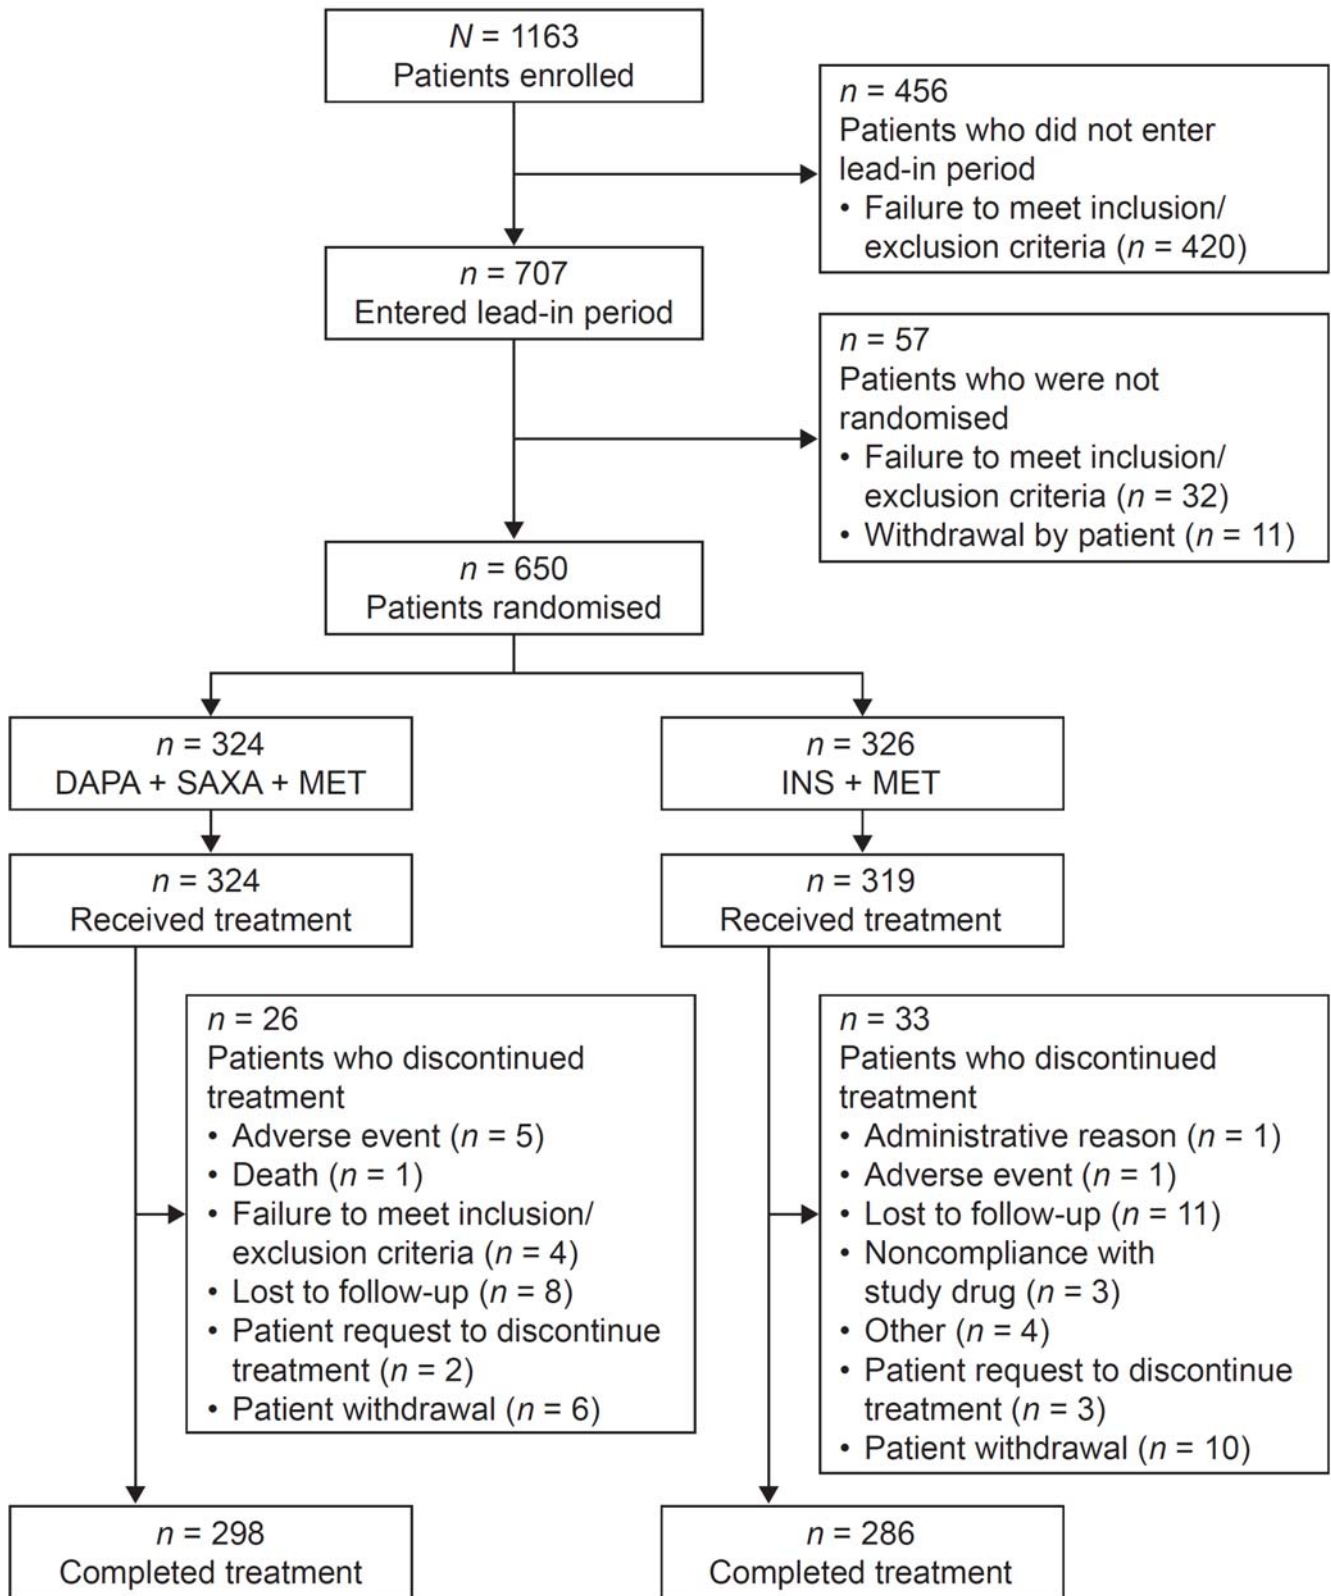

## SUPPLEMENTARY DATA

### Appendix. List of study investigators.

| Center number | Investigator name and degree | Role                   | Address                                                                                           |
|---------------|------------------------------|------------------------|---------------------------------------------------------------------------------------------------|
| 0002          | Gigi Lefebvre, MD            | Principal Investigator | Meridien Research, 4751 66th St, Saint Petersburg, FL 33709, USA                                  |
|               | Martin Bialow, MD            | Sub-Investigator       |                                                                                                   |
|               | Laurie Schweppe, MS, FNP-BC  | Sub-Investigator       |                                                                                                   |
| 0003          | David Ramstad, MD            | Principal Investigator | Hampton Roads Center For Clinical Research, Suite 600, 1035 Champions Way, Suffolk, VA 23435, USA |
| 0004          | Brock Merritt, DO            | Principal Investigator | Phoenix Clinical LLC, Suite 201, 7550 N 19th Ave., Phoenix, AZ 85021, USA                         |
| 0005          | Nabil Andrawis, MD           | Principal Investigator | Manassas Clinical Research Center, Suite 107 and 108, 9001 Digges Rd, Manassas, VA 20110, USA     |
|               | Tabitha Moche, MSN, NP-C     | Sub-Investigator       |                                                                                                   |
| 0006          | Christopher Case, MD         | Principal Investigator | Jefferson City Medical Group (Jcmg), 1241 West Stadium Blvd, Jefferson City, MO, 65109, USA       |
|               | George Carr, MD              | Sub-Investigator       |                                                                                                   |
| 0007          | Louis Chaykin, MD            | Principal Investigator | Meridien Research, Suite 107, 8043 Cooper Creek Blvd, Bradenton, FL 34201, USA                    |
|               | Michelle Mallitz, MD         | Sub-Investigator       |                                                                                                   |
|               | Laurie Schweppe, FNP         | Sub-Investigator       |                                                                                                   |
| 0002          | Louis Chaykin, MD            | Principal Investigator | Meridien Research, Suite 107, 8043 Cooper Creek Blvd, Bradenton, FL 34201, USA                    |
|               | Michelle Mallitz, MD         | Sub-Investigator       |                                                                                                   |
| 0008          | Conigliaro Jones, MD         | Principal Investigator | TLM Medical Services LLC, Suite 5G, 2701 Middleburg Drive, Columbia, SC 29204, USA                |
| 0009          | Robert Madder, MD            | Principal Investigator | Heritage Valley Medical Group Inc., 500 Sharon Rd, Beaver, PA 15009, USA                          |
|               | Brian Everhart, DO           | Sub-Investigator       |                                                                                                   |
|               | Timothy Jackson, MD          | Sub-Investigator       |                                                                                                   |
|               | Michael Oliver, MD           | Sub-Investigator       |                                                                                                   |
|               | William Rust, MD             | Sub-Investigator       |                                                                                                   |
| 0011          | Syed Naseeruddin, MD         | Principal Investigator | Central Florida Internists, 431 N. Kirkman Rd, Orlando, FL 32811, USA                             |

SUPPLEMENTARY DATA

|      |                                           |                        |                                                                                                                                                      |
|------|-------------------------------------------|------------------------|------------------------------------------------------------------------------------------------------------------------------------------------------|
| 0012 | Sanjay C Shah, MD                         | Sub-Investigator       | Clinical Trials of Texas Inc., Suite 700, 7940 Floyd Curl Drive, San Antonio, TX 78229, USA                                                          |
|      | Douglas Denham, DO                        | Principal Investigator |                                                                                                                                                      |
| 0013 | Ayoade Aworo, MSN, RN,<br>FNP-BC          | Sub-Investigator       | Texas Center for Drug Development Inc., Suite 201, 6550 Mapleridge St, Houston, TX 77081, USA                                                        |
|      | Jason Clay Miller, DO                     | Principal Investigator |                                                                                                                                                      |
| 0014 | Veronica Fragoso, MD                      | Sub-Investigator       | Central Phoenix Medical Clinic/Radiant Research, 7600 N 15th St, Phoenix, AZ 85020, USA                                                              |
|      | Ernie Riffer, MD                          | Principal Investigator |                                                                                                                                                      |
| 0015 | Larissa Harrison, BS                      | Sub-Investigator       | Diseno y Planeacion en Investigacion Medica, SC Morelos 2203 Jalisco, Guadalajara 44130, Mexico                                                      |
|      | Barbara Berry, MD                         | Sub-Investigator       |                                                                                                                                                      |
|      | Meghan Caldron, MD                        | Sub-Investigator       |                                                                                                                                                      |
|      | Barbara Lipschitz, MD                     | Sub-Investigator       |                                                                                                                                                      |
|      | Cesar Gonzalo Calvo Vargas, MD            | Principal Investigator |                                                                                                                                                      |
| 0016 | Maria Del Pilar De La Peana Rodriguez, MD | Sub-Investigator       | Unidad de Investigacion Clinica y Atencion Medica HEPA SC Pablo Neruda 3265 Piso 3-32, Colonia Prados Providencia Jalisco, Guadalajara 44670, Mexico |
|      | Jorge Manuel Valdez Soto, MD              | Sub-Investigator       |                                                                                                                                                      |
|      | Adriana Vazquez, MD                       | Sub-Investigator       |                                                                                                                                                      |
| 0017 | Marisol Herrera Marmolejo, MD             | Principal Investigator | Endocrine Associates, 5711 Almeda Rd, Houston, TX 77004, USA                                                                                         |
|      | Gerardo Bueso, PA-C                       | Principal Investigator |                                                                                                                                                      |
| 0018 | Natalie Wenske, PA-C                      | Sub-Investigator       | University of Florida College of Medicine, Jacksonville, Suite 200, Building 1, 4555 Emerson St, Jacksonville, FL 32207, USA                         |
|      | Joe Chehade, MD                           | Principal Investigator |                                                                                                                                                      |
|      | Meredith Smith, MD                        | Sub-Investigator       |                                                                                                                                                      |
| 0019 | Kent Wehmeier                             | Sub-Investigator       | University of Florida College of Medicine 300 653-1 West Eighth St, LRC 2nd Floor, L-14, Jacksonville, FL 32209, USA                                 |
|      | David Larsen, MD                          | Principal Investigator |                                                                                                                                                      |
|      |                                           |                        | Wasatch Clinical Research 4001 South 700 East , Salt Lake City, UT 84107, USA                                                                        |

SUPPLEMENTARY DATA

|      |                                           |                               |                                                                                                    |
|------|-------------------------------------------|-------------------------------|----------------------------------------------------------------------------------------------------|
|      | Brian Rasmussen, MD                       | Former Principal Investigator |                                                                                                    |
|      | Gene Fuller, MD                           | Sub-Investigator              |                                                                                                    |
|      | Timothy Young, MD                         | Sub-Investigator              |                                                                                                    |
| 0021 | Jorge Antonio Aldrete Velasco, MD         | Principal Investigator        | Paracelsus S. De Cv. Patriotismo No. 359, Col. San Pedro De Los Pinos, Mexico City 03800, Mexico   |
|      | Selynda Perez Argueta, MD                 | Sub-Investigator              |                                                                                                    |
| 0022 | Carlos Alejandro Stobschinski De Alba, MD | Principal Investigator        | Medical Private Office Avenida La Paz 2567, Col. Arcos Vallarta Jalisco, Guadalajara 44130, Mexico |
| 0023 | Robert Detweiler, MD                      | Principal Investigator        | Detweiler Family Medicine and Associates P.C., 1970 North Broad St, Lansdale, PA 19446, USA        |
|      | Evan Kessler, MD                          | Sub-Investigator              |                                                                                                    |
|      | Michael Parke, MD                         | Sub-Investigator              |                                                                                                    |
|      | Stephanie Shearer, MD                     | Sub-Investigator              |                                                                                                    |
| 0025 | Kathryn Lucas, MD                         | Principal Investigator        | Diabetes & Endocrinology Consultants, 611 N. 35th St, Morehead City, NC 28557, USA                 |
|      | Kristin Gainey-Ferree, MSN, RN, FNP-C     | Sub-Investigator              |                                                                                                    |
| 0026 | Sumana Gangi, MD                          | Principal Investigator        | Southern Endocrinology Associates PA, Suite A, 1621 N. Belt Line Rd, Mesquite, TX 75149, USA       |
|      | Gary Noworatzky, PA-C                     | Sub-Investigator              |                                                                                                    |
| 0028 | Luis Fernando Flota Cervera, MD           | Principal Investigator        | Cedime Instituto Vascular Calle 33#138-B, Merida, Yucatan 97129, Mexico                            |
|      | Hector Gomez-Ceron, MD                    | Sub-Investigator              |                                                                                                    |
| 0029 | David Fittingoff, MD                      | Principal Investigator        | Infosphere Clinical Research Inc., 7345 Medical Center Drive, West Hills, CA 91307, USA            |
|      | Dan Streja, MD                            | Sub-Investigator              |                                                                                                    |
|      | Mohammed Iqbal, MD                        | Sub-Investigator              |                                                                                                    |
| 0030 | Kwabena Ayesu, MD                         | Principal Investigator        | Omega Research Consultants, 2877 Delaney Ave., Orlando, FL 32806, USA                              |
|      | Santosh Nair, MD                          | Sub-Investigator              |                                                                                                    |
| 0031 | Pablo Canino, MD                          | Principal Investigator        | NewPhase Clinical Trials Corp., Suite 410, 333 West 41 St, Miami Beach, FL 33140, USA              |



SUPPLEMENTARY DATA

|      |                               |                               |                                                                                                                 |
|------|-------------------------------|-------------------------------|-----------------------------------------------------------------------------------------------------------------|
|      | Abelardo Vargas, MD           | Sub-Investigator              |                                                                                                                 |
| 0034 | Paul Norwood, MD              | Principal Investigator        | Valley Research, Suite 101, 550 E Herndon Ave., Fresno, CA 93720, USA                                           |
|      | Chelsea Flowe, MD             | Sub-Investigator              |                                                                                                                 |
| 0036 | David Klonoff, MA             | Principal Investigator        | Sutter Health, 100 South San Mateo Drive, San Mateo, CA 94401, USA                                              |
|      | Chhavi Mehta, MD              | Sub-Investigator              |                                                                                                                 |
| 0037 | Victoria Kuohung, BA, MD, JD  | Principal Investigator        | Beacon Clinical Research LLC, 1250 Hancock St, Quincy, MA 02169, USA                                            |
|      | Bindu Lal, MD                 | Sub-Investigator              |                                                                                                                 |
|      | Maxim Lutskey, MD, PhD        |                               |                                                                                                                 |
|      | Xichen Wang, MS               |                               |                                                                                                                 |
| 0038 | Brian MacGillivray, MD        | Principal Investigator        | DCT-Stone Oak LLC dba, Discovery Clinical Trials, Suite 102, 10999 Ih-10 West Texas, San Antonio, TX 78230, USA |
|      | Randall Schuster, MD          | Sub-Investigator              |                                                                                                                 |
| 0039 | Wynter Kipgen, MD             | Principal Investigator        | LION Research, Suite 200, 1139 36th Ave. NW, Norman, OK 73072, USA                                              |
|      | Jodi Dodson, ARNP, CNP        | Sub-Investigator              | LION Research, 1010 24th Ave. NW, Norman, OK 73069, USA                                                         |
|      | Lindsay Flaming, ARNP         | Sub-Investigator              |                                                                                                                 |
|      | Teresa Aberle, PA-C           | Sub-Investigator              |                                                                                                                 |
|      | Lisa Connery, MD              | Former Principal Investigator |                                                                                                                 |
|      | Lubna Mirza, MD               | Sub-Investigator              |                                                                                                                 |
| 0040 | Serge Jabbour, MD, FACP, FACE | Principal Investigator        | Thomas Jefferson University Hospital, 211 S 9th St, Philadelphia, PA 19107, USA                                 |
|      | Jeffrey Miller, MD            | Sub-Investigator              |                                                                                                                 |
| 0041 | Larry Distiller, Prof.        | Principal Investigator        | Centre for Diabetes and Endocrinology, 81 Central Ave., Houghton Estates, Johannesburg 2198, South Africa       |
|      | Laura Blacking, MD            | Sub-Investigator              |                                                                                                                 |
|      | Debra Gordon, MD              | Sub-Investigator              |                                                                                                                 |
|      | Barry Joffe, Prof.            | Sub-Investigator              |                                                                                                                 |
|      | Brian Kramer, MD              | Sub-Investigator              |                                                                                                                 |
|      | Stanley Landau, MD            | Sub-Investigator              |                                                                                                                 |
|      | Leila Mayet, MD               | Sub-Investigator              |                                                                                                                 |

SUPPLEMENTARY DATA

|      |                                  |                        |                                                                                                                     |
|------|----------------------------------|------------------------|---------------------------------------------------------------------------------------------------------------------|
|      | Jayalakshmi Narainsamy, MD       | Sub-Investigator       |                                                                                                                     |
| 0042 | Johannes Lombaard, MD            | Principal Investigator | Josh Research, 28 East Burger St., Rubins Building Free State, Bloemfontein 9301, South Africa                      |
|      | Zaheer Ahmed Ebrahim Hoosain, MD | Sub-Investigator       |                                                                                                                     |
|      | Sharne Foulkes, MD               | Sub-Investigator       |                                                                                                                     |
| 0043 | Camelia Panus, MD                | Principal Investigator | Urodiamed Srl, Bd. Gheorghe Chitu 35 Doj, Craiova 200342, Romania                                                   |
|      | Tomina Popescu, MD               | Sub-Investigator       |                                                                                                                     |
| 0044 | Gabriela Negrisanu, Prof.        | Principal Investigator | Centrul Medical Dr. Negrisanu, Str. Transilvania Nr. 7, Timis, Timisoara 400356, Romania                            |
|      | Polina Geru, MD                  | Sub-Investigator       |                                                                                                                     |
|      | Andreea-Andrada Moica, MD        | Sub-Investigator       |                                                                                                                     |
|      | Maria Mihaela Viruzab, MD        | Sub-Investigator       |                                                                                                                     |
| 0045 | Mircea Munteanu, Asst Prof.      | Principal Investigator | Centrul Medical Sf. Stefan, Str. Samuil Micu Nr. 9, Timis, Timisoara 300125, Romania                                |
|      | Lavinia Munteanu, MD             | Sub-Investigator       |                                                                                                                     |
|      | Patricia Sabo, MD                | Sub-Investigator       |                                                                                                                     |
| 0046 | Nicoleta Mihaela Mindrescu, MD   | Principal Investigator | Sc Nicodiab Srl, Str. Polona Nr. 92, District 1, Bucharest 010496, Romania                                          |
|      | Lucia-Luana Sebestyenl, MD       | Sub-Investigator       |                                                                                                                     |
|      | Ioana Verde, MD                  | Sub-Investigator       |                                                                                                                     |
| 0047 | Alex Guevara, MD                 | Principal Investigator | Rockwood Medical Clinic, Suite 304, 1217 Grand Ave., Fort Worth, TX 76164, USA                                      |
|      | Gustavo Pena, PA-C               | Sub-Investigator       |                                                                                                                     |
| 0049 | Sam Miller, MD                   | Principal Investigator | Science Advancing Medicine (Sam) Clinical Research, Suite 300, 7711 Louis Pasteur Drive, San Antonio, TX 78229, USA |
| 0050 | Trevenesan Padayachee, MD        | Principal Investigator | Aliwal Shoal Medical Centre, 14 Bissett St , Umkomaas, Kwa-Zulu-Natal 4170, South Africa                            |
|      | Parimala Govender, MD            | Sub-Investigator       |                                                                                                                     |
| 0051 | John Agaiby, MD                  | Principal Investigator | Clinical Investigation Specialists Inc., 6121 Green Bay Rd, Kenosha, WI 53142, USA                                  |
|      | Elizabeth Joseph, MD             | Sub-Investigator       |                                                                                                                     |
|      | Jennifer Hoenig, APNP            | Sub-Investigator       |                                                                                                                     |
| 0052 | Dany Musungaie, Prof.            | Principal Investigator | Jongaie Research, 551 WF Nkomo St, Pretoria West 183,                                                               |

SUPPLEMENTARY DATA

|      |                                |                        |                                                                                                                             |
|------|--------------------------------|------------------------|-----------------------------------------------------------------------------------------------------------------------------|
|      |                                |                        | Gauteng, South Africa                                                                                                       |
| 0053 | Zdenka Krejsova, MD            | Principal Investigator | Diabetologicka ambulance Namesti Dr. M. Horakove 1313/8, Karlovy Vary 36001, Czech Republic                                 |
|      | Gita Makofova, MD              | Sub-Investigator       |                                                                                                                             |
| 0055 | Hilde Wasserbugerova, MD       | Principal Investigator | DIKa centrum s.r.o, Kardiologicka a interni ambulance, Karvinska 5/1518, Havirov 73601, Czech Republic                      |
|      | Barbara Buzova, Dr Med         | Sub-Investigator       |                                                                                                                             |
|      | Sylva Kopecka, Dr Med          | Sub-Investigator       |                                                                                                                             |
| 0058 | Iuliana Filip, MD              | Principal Investigator | Elitmedical Vasile Lupu St. Nr. 2 BI 32 EF, Ploiesti, Prahova 100018, Romania                                               |
|      | Oana Tudose, MD                | Sub-Investigator       |                                                                                                                             |
| 0059 | Andrew Jacovides, MD           | Principal Investigator | Midrand Medical Centre Shop #1, Health Emporium, Corner Church and Market Sts, Gauteng Halfway House 1685, South Africa     |
|      | Shantakumari Ramduth, MD       | Sub-Investigator       |                                                                                                                             |
| 0060 | Jaco Jc Jurgens, MD            | Principal Investigator | Djw Navorsing Box 84, 70 Shannonroad, Paardekraal, Noordheuwel, Krugersdorp 1739, South Africa                              |
| 0062 | Leon Fogelfeld, MD             | Principal Investigator | John H. Stroger, Jr. Hospital of Cook County, 1900 W Polk St, Chicago, IL 60612, USA                                        |
|      | Sharon Fung, PhD, Rn, APN-CNS  | Sub-Investigator       |                                                                                                                             |
|      | Yannis Guerra, MD              | Sub-Investigator       |                                                                                                                             |
|      | Geraldine Holt, RN, MS         | Sub-Investigator       |                                                                                                                             |
|      | Jessica Hwang, MD              | Sub-Investigator       |                                                                                                                             |
|      | Lynn Kessler, MD               | Sub-Investigator       |                                                                                                                             |
|      | Anoopa Koshy, MD               | Sub-Investigator       |                                                                                                                             |
|      | Susana Mascarell, MD, MS       | Sub-Investigator       |                                                                                                                             |
|      | Chioma Onyenwenyi, MD, MB      | Sub-Investigator       |                                                                                                                             |
|      | Jasseena Veliyathumalil, FNP   | Sub-Investigator       |                                                                                                                             |
| 0063 | Cristina Victoria Mistodie, MD | Principal Investigator | S.C. Milena Sante S.R.L, Diabet Zaharat, Nutritie si Boli Metabolice, Str. Nicolae Balcescu, Nr. 31, Galati 800001, Romania |
|      | Valentin Bulza, MD             | Sub-Investigator       | Dr Mistodie, Cristina Victoria MD, Office of Str. Brailei, Nr. 68, Bloc Br 3, Ap. 4, Galati 800098, Romania                 |
| 0064 | Andrew Bartlett, MD            | Principal Investigator | PMG Research of Christie Clinic LLC, 1801 West Windsor Rd,                                                                  |

SUPPLEMENTARY DATA

|      |                                                                             |                                                                              |                                                                                                         |
|------|-----------------------------------------------------------------------------|------------------------------------------------------------------------------|---------------------------------------------------------------------------------------------------------|
|      |                                                                             |                                                                              | Champaign, IL 61822, USA                                                                                |
|      | Tegan McCormick, MD<br>Sumuk Sundaram, MD                                   | Sub-Investigator<br>Sub-Investigator                                         |                                                                                                         |
| 0065 | Simona Camelia Tivadar, MD                                                  | Principal Investigator                                                       | Sanatatea Ta Medical Center, 44 Viitorului St, Bucharest 20614, Romania                                 |
|      | Andriana Dumitrescu, MD<br>Oana-Andreea Parliteanu, MD                      | Sub-Investigator<br>Sub-Investigator                                         |                                                                                                         |
| 0066 | Hemant Makan, MD                                                            | Principal Investigator                                                       | Office of Dr Hemant Makan MD, Suite 6, 80 Gemsbok Ave., Seva Sadan, Lenasia, Gauteng 1827, South Africa |
| 0067 | Ivy-Joan Madu, MD                                                           | Principal Investigator                                                       | Diabetes Associates Medical Group, Suite 106 and 205, 1234 West Chapman Ave., Orange, CA 92868, USA     |
|      | Paul Rosenblit, PhD, FACE,<br>FNLA                                          | Sub-Investigator                                                             |                                                                                                         |
| 0068 | Hiralal G. Maheshwari, MD, PhD                                              | Principal Investigator                                                       | Midwest Endocrinology, 380 Terra Cotta Rd, Crystal Lake, IL 60012, USA                                  |
| 0069 | Lisa Crandall, MD                                                           | Principal Investigator                                                       | In-Quest Medical Research LLC, 5245 Buford Hwy, Norcross, GA 30071, USA                                 |
|      | Esther Lim, MD                                                              | Former Principal Investigator                                                |                                                                                                         |
|      | Naresh Parikh, MD                                                           | Former Principal Investigator                                                |                                                                                                         |
|      | Kota Reddy                                                                  | Sub-Investigator                                                             | In-Quest Medical Research LLC, 6330 Primrose Hill Court, Norcross, GA 30092, USA                        |
| 0070 | Steve Sitar, MD                                                             | Principal Investigator                                                       | Orange County Clinical Trials Inc., Suite 409, 1801 West Romney Drive, Anaheim, CA 92801, USA           |
|      | Grace Young, MD<br>Francisco Badar, MD                                      | Sub-Investigator<br>Sub-Investigator                                         | Core Research Group, 19123 Bloomfield Ave., Cerritos, CA 90703, USA                                     |
| 0071 | Paul Wakefield, MD                                                          | Principal Investigator                                                       | PMG Research Inc, 1200 Merchant Drive, Knoxville, TN 37912, USA                                         |
|      | Todd Peters, MD<br>Michael H West<br>Mark Pritcher, MD<br>Todd Chambers, MD | Sub-Investigator<br>Sub-Investigator<br>Sub-Investigator<br>Sub-Investigator |                                                                                                         |
| 0072 | Lenka Dohnalova, MD                                                         | Principal Investigator                                                       | Diabetologie, interna Aatice Aeikolskaat 17, Matice skolske                                             |

SUPPLEMENTARY DATA

|      |                               |                        |                                                                                        |
|------|-------------------------------|------------------------|----------------------------------------------------------------------------------------|
|      |                               |                        | 17, Ceske Budejovice, Aeikolskaat 37001, Czech Republic                                |
|      | Jana Donalova, MD             | Sub-Investigator       |                                                                                        |
| 0075 | Rigoberto Reguero, MD         | Principal Investigator | Applemed Research Inc., 6850 Coral Way, Miami, FL 33155, USA                           |
|      | Agustin Latorre, MD           | Sub-Investigator       |                                                                                        |
|      | Lidya Acosta-Valdes           | Sub-Investigator       |                                                                                        |
| 0076 | Alvaro Ocamp, MD              | Principal Investigator | SouthCoast Research Center Inc., Suite 901, 1011 Sunnybrook Road, Miami, FL 33136, USA |
|      | Mara Rodriguez, MD            | Sub-Investigator       |                                                                                        |
| 0078 | Drahomira Gulakova, MD        | Principal Investigator | Medicon, Antala Staska 80, Prague 140 00, Czech Republic                               |
|      | Michala Pelikanova, MD        | Sub-Investigator       |                                                                                        |
| 0080 | Tomas Brychta, MD, PhD        | Principal Investigator | Agentura Science Pro, Dlouha 34, Olomouc 77200, Czech Republic                         |
|      | Svetlana Hrachovinova, Dr Med | Sub-Investigator       |                                                                                        |
| 0081 | Martin Petr, MD               | Principal Investigator | Hostinskeho 1533, Prague 155 00, Czech Republic                                        |
|      | Alena Andresova, MD           | Sub-Investigator       |                                                                                        |
| 0082 | Franklin Zieve, MD            | Principal Investigator | VA Medical Center, 1201 Broad Rock Blvd (111C), Richmond, VA 23249, USA                |
|      | Sonja Fredrickson, MD, BC-ADM | Sub-Investigator       |                                                                                        |
|      | James Levy, MD                | Sub-Investigator       |                                                                                        |
|      | Phillip Tarkington, MD        | Sub-Investigator       |                                                                                        |
| 0083 | William Biggs, MD             | Principal Investigator | Amarillo Medical Specialists, Suite 400, 1215 Coulter St, Amarillo, TX 79106, USA      |
|      | Edwin Dondon, MD              | Sub-Investigator       |                                                                                        |
| 0084 | John Cosby, MD                | Principal Investigator | Oceane7 Clinical Research LLC, 8200 W Flagler St, Miami, FL 33144-2155, USA            |
|      | Miguel Aponte, MD             | Sub-Investigator       |                                                                                        |
| 0086 | Jiri Pumpria, MD              | Principal Investigator | PreventaMed, s.r.o., Vila Zdravi, Dominovina 2/744, Olomouc 779 00, Czech Republic     |
|      | Frantisek Sincl, MD           | Sub-Investigator       |                                                                                        |
| 0087 | Juan Pablo Frias, MD          | Principal Investigator | National Research Institute, 302, 2010 Wilshire Blvd, Los Angeles, CA 90057, USA       |
|      | Stanley Hsia, MD              | Sub-Investigator       |                                                                                        |

SUPPLEMENTARY DATA

|      |                                                                                        |                                                                              |                                                                                                                      |
|------|----------------------------------------------------------------------------------------|------------------------------------------------------------------------------|----------------------------------------------------------------------------------------------------------------------|
|      | Robert Jenders, MD<br>Sharon Kelly, NP                                                 | Sub-Investigator<br>Sub-Investigator                                         |                                                                                                                      |
| 0089 | Stanley Hsia, MD                                                                       | Principal Investigator                                                       | National Research Institute, 6120 Seville Ave., Huntington Park, CA 90255, USA                                       |
|      | Juan Pablo Frias, MD, FACE<br>Tricia Leon, MD<br>Parvin Syal, MD<br>Robert Jenders, MD | Sub-Investigator<br>Sub-Investigator<br>Sub-Investigator<br>Sub-Investigator | National Research Institute, 302, 2010 Wilshire Blvd, Los Angeles, CA 90057, USA                                     |
| 0090 | Sharon Kelly, NP<br>Amina Haggag, MD                                                   | Sub-Investigator<br>Principal Investigator                                   | Anaheim Clinical Trials, Suite 303, 1085 N. Harbor Blvd, Anaheim, CA 92801, USA                                      |
| 0091 | Peter Winkle, MD<br>Ripley Hollister, MD                                               | Sub-Investigator<br>Principal Investigator                                   | Lynn Institute of the Rockies, 2960 North Circle Drive, Colorado Springs, CO 80909, USA                              |
|      | William Stone, MD<br>Lewis Romett, MD                                                  | Former Principal Investigator<br>Sub-Investigator                            |                                                                                                                      |
| 0092 | Teresa Sligh, MD                                                                       | Principal Investigator                                                       | Providence Clinical Research c/o Pharmaseek LLC, Suite 300A, 6400 Laurel Canyon Blvd, North Hollywood, CA 91606, USA |
|      | Samuel Ceballos, CRC<br>George Melikian, MD, MPH<br>Scott Sligh, MD                    | Sub-Investigator<br>Sub-Investigator<br>Sub-Investigator                     |                                                                                                                      |
| 0093 | Mark Kutner, MD                                                                        | Principal Investigator                                                       | Suncoast Research Group LLC, 2128 West Flagler St, Miami, FL 33135, USA                                              |
|      | Azarel Abinader, MD<br>Eduardo Navarro, ARNP, MSN                                      | Sub-Investigator<br>Sub-Investigator                                         |                                                                                                                      |
| 0094 | Karlton Pettis, MD                                                                     | Principal Investigator                                                       | Metrolina Internal Medicine, Suite 110, 700 South Torrence St, Charlotte, NC 28204, USA                              |
|      | Clarence Ellis, MD<br>David Smith, MD                                                  | Sub-Investigator<br>Sub-Investigator                                         |                                                                                                                      |
| 0095 | Daniel Whitmer, MD                                                                     | Principal Investigator                                                       | Clinical Inquest Center, 1911 North Fairfield Rd, Beavercreek, OH 45432, USA                                         |
|      | Avni Arora, MD                                                                         | Sub-Investigator                                                             |                                                                                                                      |

SUPPLEMENTARY DATA

|      |                                                                                                                                                                                   |                                                                                                                                                              |                                                                                                        |
|------|-----------------------------------------------------------------------------------------------------------------------------------------------------------------------------------|--------------------------------------------------------------------------------------------------------------------------------------------------------------|--------------------------------------------------------------------------------------------------------|
|      | Rameswar Chaudhuri, MD<br>Candace Hefner, MA<br>Catherine McNamara, MA                                                                                                            | Sub-Investigator<br>Sub-Investigator<br>Sub-Investigator                                                                                                     |                                                                                                        |
| 0096 | Guillermo Somodevilla, MD                                                                                                                                                         | Principal Investigator                                                                                                                                       | Cordova Research Institute, Suite 101, 7815 Coral Way,<br>Miami, FL 33155, USA                         |
|      | Alejandro Espaillat, MD                                                                                                                                                           | Sub-Investigator                                                                                                                                             |                                                                                                        |
| 0097 | Katarina Halciakova, MD                                                                                                                                                           | Principal Investigator                                                                                                                                       | Heart Solution Kartouzska 3274/10, Prague 150 00, Czech<br>Republic                                    |
|      | Stepanka Stehlikova, MD                                                                                                                                                           | Former Principal<br>Investigator                                                                                                                             | Medifin a.s, diabetologie, Kartouzska 204/6, Prague 150 00,<br>Czech Republic                          |
|      | Iva Skarpova, MD                                                                                                                                                                  | Sub-Investigator                                                                                                                                             |                                                                                                        |
| 0099 | Ralph Wade, MD                                                                                                                                                                    | Principal Investigator                                                                                                                                       | Progressive Clinical Research, Suite 117, 425 South Medical<br>Drive, Bountiful, UT 84010, USA         |
|      | Jonna Nash, MA, CCRC<br>David Badham, PA-C<br>Daniel Chappell, DO<br>Allison Hanna, DO<br>MarDiene Jeffs, PA-C<br>Hannah Porter, PA-C<br>Sandra Waite, APRN<br>Sean Webster, PA-C | Sub-Investigator<br>Sub-Investigator<br>Sub-Investigator<br>Sub-Investigator<br>Sub-Investigator<br>Sub-Investigator<br>Sub-Investigator<br>Sub-Investigator |                                                                                                        |
| 0100 | Bernd Becker, MD                                                                                                                                                                  | Principal Investigator                                                                                                                                       | Praxis Am Markt (Dr Becker), Weidkamp 1 Nordrhein-<br>Westfalen, Essen 45355, Germany                  |
|      | Lanah Dabach, MD                                                                                                                                                                  | Sub-Investigator                                                                                                                                             |                                                                                                        |
| 0102 | Elwira Gromniak, MD                                                                                                                                                               | Principal Investigator                                                                                                                                       | Indywidualna Specjalistyczna Praktyka Lekarska ul.<br>Starzynskiego 2, Szczecin 70-506, Poland         |
|      | Izabella Majewska, MD<br>Agnieszka Niemiec, MD                                                                                                                                    | Sub-Investigator<br>Sub-Investigator                                                                                                                         |                                                                                                        |
| 0103 | Andrea Grosz, Diabetologist                                                                                                                                                       | Principal Investigator                                                                                                                                       | Betegapolo Irgalmas Rend, Budai Irgalmasrendi Korhaz,<br>Frankel Leo St. 17–19, Budapest 1027, Hungary |
|      | Janos Tibor Kis, Diabetologist<br>Erika Palhegyi, Dr Med<br>Zsofia Kiss, Diabetologist<br>Laszlo Schadl, PhD                                                                      | Sub-Investigator<br>Sub-Investigator<br>Sub-Investigator<br>Sub-Investigator                                                                                 |                                                                                                        |
| 0104 | Dominik Dahl, MD                                                                                                                                                                  | Principal Investigator                                                                                                                                       | Gemeinschaftspraxis fuer Innere Medizin und Diabetologie,                                              |

SUPPLEMENTARY DATA

|      |                                |                        |                                                                                              |
|------|--------------------------------|------------------------|----------------------------------------------------------------------------------------------|
|      |                                |                        | Beselerstr. 2a, Hamburg 22607, Germany                                                       |
|      | Ulrich Wendisch, MD            | Sub-Investigator       |                                                                                              |
| 0106 | Cristobal Morales Portillo, MD | Principal Investigator | Hospital Universitario Virgen Macarena Avda Dr Fredriani, 3 Semisotano, Sevilla 41009, Spain |
|      | Mariola Mendez Muros, MD       | Sub-Investigator       |                                                                                              |
| 0107 | Anna Olak-Popko, MD            | Principal Investigator | MTZ Clinical Research Sp. z o.o., Pawinskiego 5, Warszawa 02-106, Poland                     |
|      | Inga Chomicka, MD              | Sub-Investigator       |                                                                                              |
|      | Anna Dryja, MD                 | Sub-Investigator       |                                                                                              |
|      | Katarzyna Wolder, MD           | Sub-Investigator       |                                                                                              |
| 0108 | Ewa Pankowska, Asst Prof.      | Principal Investigator | Institut Diabetologii Sp. z o.o., Zeganska 46A, Warszawa 04-736, Poland                      |
|      | Zuzanna Sklodowska, MD         | Sub-Investigator       |                                                                                              |
|      | Joanna Wardaszko, MD           | Sub-Investigator       |                                                                                              |
| 0109 | Dorota Pisaczyk-Wiza, MD       | Principal Investigator | Gaja Poradnie Lekaskie Os., Orla Bialego 103, Poznan 61-251, Poland                          |
|      | Joanna Dytfeld, MD             | Sub-Investigator       |                                                                                              |
|      | Anna Majchrzak, MD             | Sub-Investigator       |                                                                                              |
| 0110 | Hasan Alawi, MD                | Principal Investigator | Diabetologische Praxis Dr Alawi, Brueckenstr. 30, Saarlouis 66740, Germany                   |
|      | Bernd Warken, MD               | Sub-Investigator       |                                                                                              |
| 0111 | Janos Bárdos, MD               | Principal Investigator | Diab 2002 Bt Diabetes Gondozó, Nap str. 2, Mako 6900, Hungary                                |
|      | Maria Domokos, MD              | Sub-Investigator       |                                                                                              |
| 0112 | Albert Szocs, MD               | Principal Investigator | Szocs Depot Kft Jozsef A. U. 52. I.5, Budapest 1042, Hungary                                 |
|      | Endre Adorjani, MD             | Sub-Investigator       |                                                                                              |
| 0114 | Eleonora Beke, MD              | Principal Investigator | Szent Margit Rendelointezet, Vorosvari ut 88–96, Budapest 1032, Hungary                      |
|      | Ivan Ory, MD                   | Sub-Investigator       |                                                                                              |
| 0115 | Katazyna Madziarska, MD        | Principal Investigator | WroMedica S.C., Mickiewicza 91, Wroclaw 51685, Poland                                        |
|      | Elzbieta Kalicinska, MD        | Sub-Investigator       |                                                                                              |
|      | Alicja Tuzcek-Nowak, MD        | Sub-Investigator       |                                                                                              |
| 0116 | Laszlo Konyves, MD             | Principal Investigator | Lausmed Kft. Fulep Lajos U. 15, Baja 6500, Hungary                                           |
|      | Monika Farago, MD              | Sub-Investigator       |                                                                                              |



SUPPLEMENTARY DATA

|      |                                     |                        |                                                                                                                                                    |
|------|-------------------------------------|------------------------|----------------------------------------------------------------------------------------------------------------------------------------------------|
| 0117 | Pedro Mezquita Raya, MD             | Principal Investigator | Clinica San Pedro, Plaza de San Pedro 5, Almeria 4001, Spain                                                                                       |
|      | Daniel Cepero, MD                   | Sub-Investigator       |                                                                                                                                                    |
|      | Miguel Gomez Matarin, MD            | Sub-Investigator       |                                                                                                                                                    |
|      | Rebeca Reyes Garcia, MD             | Sub-Investigator       |                                                                                                                                                    |
| 0118 | Orsolya Kiss, MD                    | Principal Investigator | Swan Med Hungary Kft Baross Str. no. 7, Letavertes 4281, Hungary                                                                                   |
|      | Edit Nagy, MD                       | Sub-Investigator       |                                                                                                                                                    |
| 0120 | Marta Dziermanska-Krysztopowicz, MD | Principal Investigator | RENEW Kinika Medycyny Estetycznej Bialystok, Gajowa 29, Bialystok 15-794, Poland                                                                   |
|      | Lukasz Bolkun, MD                   | Sub-Investigator       |                                                                                                                                                    |
|      | Marta Piascik, MD                   | Sub-Investigator       |                                                                                                                                                    |
| 0123 | Andras Vertes, MD                   | Principal Investigator | Del-pesti Centrumkorhaz-Orszagos Hematologiai es Infektologiai Intezet, Nagyvarad ter. 1, Budapest 1097, Hungary                                   |
|      | Istvan Kosa, MD                     | Sub-Investigator       |                                                                                                                                                    |
| 0125 | Alfonso Soto Gonzalez, MD           | Principal Investigator | Centro de Gestion Integrada de A Coruna Servicio de Endocrinologia 3a Planta, 84 Hotel de Pacientes, Planta 6, despacho 614, A Coruna 15006, Spain |
|      | Fernando Toba Alonso, MD            | Sub-Investigator       |                                                                                                                                                    |
|      | Oscar Ferreiro, MD                  | Sub-Investigator       |                                                                                                                                                    |
| 0126 | Zsolt Sudar, MD                     | Principal Investigator | Tolna County Balassa Janos Hospital Beri Balogh Adam U. 6-7, Tolna Szekszard 7100, Hungary                                                         |
|      | Vince Szi, MD                       | Sub-Investigator       |                                                                                                                                                    |
|      | Gabriella Ulrich, MD                | Sub-Investigator       |                                                                                                                                                    |
| 0130 | Artur Rul, MD                       | Principal Investigator | Niepubliczny Zaklad Opieki Zdrowotnej CEREO-MED Sp. z o.o., Zbocze 18A Lodz, Lodzkie 92-003, Poland                                                |
|      | Hubert Stefan, MD                   | Sub-Investigator       |                                                                                                                                                    |
| 0132 | Hanna Krysiak-Kowaluk, MD           | Principal Investigator | RCMed Oddzia, Zeromskiego 41A, Sochaczew 96-500, Poland                                                                                            |
|      | Piotr Opadczuk, MD                  | Sub-Investigator       |                                                                                                                                                    |
|      | Jan Zambrzycki, MD                  | Sub-Investigator       |                                                                                                                                                    |
| 0137 | Miklos Kajetan, MD                  | Principal Investigator | Strazsahegy Medicina Haziorsosi Rendelo Zrinyi Ut 224/A, Budapest 1170, Hungary                                                                    |
|      | Edina Hernandez, MD                 | Sub-Investigator       |                                                                                                                                                    |

## SUPPLEMENTARY DATA

|      |                                       |                        |                                                                                                                                                  |
|------|---------------------------------------|------------------------|--------------------------------------------------------------------------------------------------------------------------------------------------|
|      | Akos Veres, MD                        | Sub-Investigator       |                                                                                                                                                  |
| 0138 | Marcus Lind, Asst Prof.               | Principal Investigator | NU Hospital Group Diabetes Outpatient Clinic, Uddevalla Hospital, Uddevalla 45180, Sweden                                                        |
|      | Bo Grande, MD                         | Sub-Investigator       |                                                                                                                                                  |
|      | Ioannis Bounias, MD                   | Sub-Investigator       |                                                                                                                                                  |
|      | Helene Dimenas, MD                    | Sub-Investigator       |                                                                                                                                                  |
|      | Mauro Tancredi, MD                    | Sub-Investigator       |                                                                                                                                                  |
| 0141 | Robert Silver, MD                     | Principal Investigator | Southern New Hampshire Diabetes and Endocrinology, 29 Northwest Blvd, Nashua, NH 03063, USA                                                      |
|      | Ellie Chuang, MD                      | Sub-Investigator       |                                                                                                                                                  |
| 0143 | Lluis Martinez Palli, MD              | Principal Investigator | CAP Atencion Primaria Vallcarca, Sant Gervasi Av. Vallcarca, Barcelona 169-205, Spain                                                            |
| 0144 | Jacek Zieleniewski, MD                | Principal Investigator | RCMed Nowy Duninow Ul., Długa 2, Nowy Duninow 09-505, Poland                                                                                     |
|      | Piotr Opadczuk, MD                    | Sub-Investigator       |                                                                                                                                                  |
|      | Katarzyna Urbanska, MD                | Sub-Investigator       |                                                                                                                                                  |
| 0145 | Tuan Huy Tran, MD                     | Principal Investigator | Omega Clinical Research Center, Suite 103, 3901 Houma Blvd, Metairie, LA 70006, USA                                                              |
|      | Jonathan Wise, MD, FACP               | Sub-Investigator       |                                                                                                                                                  |
| 0150 | Monika Lukaszewicz, MD                | Principal Investigator | Centrum Badan Klinicznych PI-House sp. z o.o., Na Zaspie 3, Gdansk 80-546, Poland                                                                |
|      | Marta Tumialis, MD                    | Sub-Investigator       |                                                                                                                                                  |
| 0151 | Slawomir Pynka, MD                    | Principal Investigator | Niepubliczny Zakad Opieki Zdrowotnej Sawomir Pynka Poradnia Diabetologiczno-Internistyczna, 5 Lipca 36B, Szczecin 70-376, Poland                 |
|      | Jaroslaw Ogonowski, MD                | Sub-Investigator       |                                                                                                                                                  |
| 0155 | Charlotte Delavaran, MD               | Principal Investigator | Probar E Lund AB, Lilla Fiskaregatan 10, Lund 222 22, Sweden                                                                                     |
|      | Anders Luts, MD                       | Sub-Investigator       |                                                                                                                                                  |
| 0160 | Emilia Pelayo Orozco, MD              | Principal Investigator | Centro de Investigacion Medica de Occidente S.C., Avenida Empresarios 150, Torre Elite, piso 16 consultorio 1602, Zapopan, Jalisco 45116, Mexico |
|      | Sandra Obdulia Caballero Ganzalez, MD | Sub-Investigator       |                                                                                                                                                  |
|      | Lucero Garcia Arredondo, MD           | Sub-Investigator       |                                                                                                                                                  |

## SUPPLEMENTARY DATA

|      |                                                                                                                             |                                                                                        |                                                                                                                                                        |
|------|-----------------------------------------------------------------------------------------------------------------------------|----------------------------------------------------------------------------------------|--------------------------------------------------------------------------------------------------------------------------------------------------------|
| 0161 | Margareta Leonardsson-Hellgren, MD<br>Joel Ellbin Andersson, MD<br>Han Nguyen, MD<br>Yang Shao, MD                          | Principal Investigator<br>Sub-Investigator<br>Sub-Investigator<br>Sub-Investigator     | Primary care Trial Center (PTC), Naverlursgatan 42, Vastra Frolunda 421 44, Sweden                                                                     |
| 0162 | Marc Oliver Kornmann, MD<br><br>Andreas Guenther Eich, MD<br>Stefanie Franke, MD<br>Alexander Mann, Priv. Doz. Dr Med       | Principal Investigator<br><br>Sub-Investigator<br>Sub-Investigator<br>Sub-Investigator | IKF Institut fuer klinische Forschung, Schaumainkai 101–103, Frankfurt am Main 60596, Germany                                                          |
| 0163 | Hermann Braun, Diabetologist<br><br>Edith Maria Ohrig-Pohl                                                                  | Principal Investigator<br><br>Sub-Investigator                                         | Diabetespraxis Prenzlauer Allee, Prenzlauer Allee 146, Berlin 10409, Germany                                                                           |
| 0164 | Eugenia Czajkowska-Kaczmarek, MD<br>Maria Dabrowska, MD<br>Barbara Kaczmarek, MD<br>Krystyna Opawska, MD                    | Principal Investigator<br><br>Sub-Investigator<br>Sub-Investigator<br>Sub-Investigator | Polimedica Centrum Badan, Profilaktyki I Leczenia, Witkacego 2D, Zgierz 95-100, Poland                                                                 |
| 0165 | Jolanta Kitowska-Koterla, MD<br><br>Alina Strzala-Kleczek, MD<br>Tomasz Szczepanik, MD<br>Gabriela Watemborska-Matuszyk, MD | Principal Investigator<br><br>Sub-Investigator<br>Sub-Investigator<br>Sub-Investigator | Centrum Medyczne Pratia Katowice, Dabrowki 13, Katowice 40-081, Poland                                                                                 |
| 0166 | Manuel Enrique Aguilera Real, MD                                                                                            | Principal Investigator                                                                 | Centro De Investigacion Biomedica Y Farmaceutica San Francisco 657-A, 8-B, Colonia Del Valle, Delegacion Benito Juarez, Distrito Federal 03100, Mexico |
| 0167 | Grazyna Cieslik, MD<br><br>Karolina Cieslik, MD<br>Malgorzata Walus-Miarka, MD                                              | Principal Investigator<br><br>Sub-Investigator<br>Sub-Investigator                     | Centrum Medyczne Pratia Krakow Ul., Pradnicka 12. lok. 502, Krakow, Malopolska 30002, Poland                                                           |
| 0169 | Fernando Flores-Lozano, MD                                                                                                  | Principal Investigator                                                                 | Universidad Autonoma de Guadalajara – Hospital Dr Angel Leano (HAL), Av. Dr Angel Leano 500 Colonia Los Robles, Zapopan, Jalisco 45200, Mexico         |

SUPPLEMENTARY DATA

|      |                                      |                        |                                                                                                                                                        |
|------|--------------------------------------|------------------------|--------------------------------------------------------------------------------------------------------------------------------------------------------|
|      | Celia M Anaya Preciado               | Sub-Investigator       |                                                                                                                                                        |
|      | Ana Maria Barragan Vigil, MD         | Sub-Investigator       |                                                                                                                                                        |
|      | Angela Cabeza-Gomez, MD              | Sub-Investigator       |                                                                                                                                                        |
|      | Elena Calarco Zaccari, MD            | Sub-Investigator       |                                                                                                                                                        |
| 0170 | Staffan Salmonsson, MD               | Principal Investigator | Obackakliniken, Harnosands Sjukhus Sodra Vagen 3-5, Harnosand 871 82, Sweden                                                                           |
|      | Kjell Antus, MD                      | Sub-Investigator       |                                                                                                                                                        |
| 0172 | Pedro Alberto Garcia Hernandez, MD   | Principal Investigator | Hospital Universitario Dr Jose Eleuterio Gonzalez, Av. Francisco I Madero y Gonzalitos S/N, Colonia Mitras Centro, Monterrey, Nuevo Leon 64460, Mexico |
|      | Franciso Javier Cavazos Oliveros, MD | Sub-Investigator       |                                                                                                                                                        |
|      | Claudia Aida Flores Moreno, MD       | Sub-Investigator       |                                                                                                                                                        |
|      | Alejandra Santiago Aguirre, MD       | Sub-Investigator       |                                                                                                                                                        |
| 0174 | Hans Perrild, MD                     | Principal Investigator | Bispebjerg Hospital Afdeling IC Forskning, Bispebjerg Bakke 23, Bygning 11, indgang 11B stuen Gallen, Copenhagen NV 2400, Denmark                      |
|      | Malin Nilsson, MD                    | Sub-Investigator       |                                                                                                                                                        |
|      | Ane Mette Zander Olsen, MD           | Sub-Investigator       |                                                                                                                                                        |
| 0175 | Dennis Karounos, MD                  | Principal Investigator | Lexington VA Medical Center, Suite 111C, 1101 Veterans Dr., Lexington, KY 40502, USA                                                                   |
|      | Derik Adams, DO                      | Sub-Investigator       |                                                                                                                                                        |
|      | Matthew Hager, MD                    | Sub-Investigator       |                                                                                                                                                        |
| 0176 | Michelle Welch, MD                   | Principal Investigator | Consano Clinical Research, Suite 320, 4118 Pond Hill Road, Bldg 3, Shavano Park, TX 78231, USA                                                         |
|      | Daniel Katselnik, MD                 | Sub-Investigator       |                                                                                                                                                        |
| 0177 | Rick Whiles, MD                      | Principal Investigator | Holston Medical Group, Suite 2600, 240 Medical Park Blvd, Bristol, TN 37620, USA                                                                       |
|      | Andrew Brockmyre, MD                 | Sub-Investigator       |                                                                                                                                                        |
|      | Samuel Plucker, MD                   | Sub-Investigator       |                                                                                                                                                        |
|      | Candyce Poteet, APRN                 | Sub-Investigator       |                                                                                                                                                        |
|      | Roger Begley, LPN                    | Sub-Investigator       |                                                                                                                                                        |
| 0178 | Curtis Jantzi, MD                    | Principal Investigator | Holston Medical Group, 105 West Stone Dr, 3rd Floor, Kingsport, TN 37660, USA                                                                          |
|      | Shance Daniell, PA-C                 | Sub-Investigator       |                                                                                                                                                        |

SUPPLEMENTARY DATA

---

|      |                    |                        |                                                           |
|------|--------------------|------------------------|-----------------------------------------------------------|
|      | David Morin, MD    | Sub-Investigator       |                                                           |
| 0179 | Keith Harrison, MD | Principal Investigator | Bally Medical Group, 1315 Route 100, Barto, PA 19504, USA |

---
